# Supplementary material for: miR-223-3p as a potential biomarker and player for adipose tissue dysfunction preceding type 2 diabetes onset
Source: PubMed Central journal article supplement — Mol Ther Nucleic Acids. 2021 Jan 20;23:1035–52. doi: 10.1016/j.omtn.2021.01.014 (PMC7868931; doi:10.1016/j.omtn.2021.01.014), 2021-01-20
Supplement: mmc1.pdf [file mmc1.pdf]

## Supplemental Information

### ***miR-223-3p* as a potential biomarker and player for adipose tissue dysfunction preceding type 2 diabetes onset**

**Julia Sánchez-Ceinos, Oriol A. Rangel-Zuñiga, Mercedes Clemente-Postigo, Alicia Podadera-Herreros, Antonio Camargo, Juan Francisco Alcalá-Díaz, Rocío Guzmán-Ruiz, José López-Miranda, and María M. Malagón**

## SUPPLEMENTAL INFORMATION

### SUPPLEMENTAL FIGURES

**Figure S1 (Related to Figures 4I-5O)**

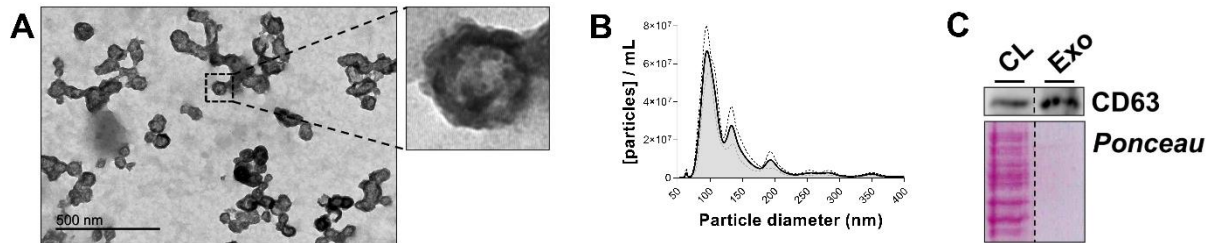

**Figure S1 (Related to Figures 4I-5O). Exosome Isolation from 3T3-L1 Cells Culture Supernatant.** Representative image and magnification of transmission electron microscopy (TEM) micrographs of exosome-like particles released by 3T3-L1 cells. Scale bar=500nm. (B) Representative size/concentration distribution of nanoparticles by NanoSight particle-tracking analysis (NTA). Mean is represented as a continue line and  $\pm$ SEM is represented as dotted lines. (C) Representative blot of CD63 in 3T3-L1 cells total lysate (CL) and exosome purification fraction (Exo).

**Figure S2 (Related to Figures 5A-O)**

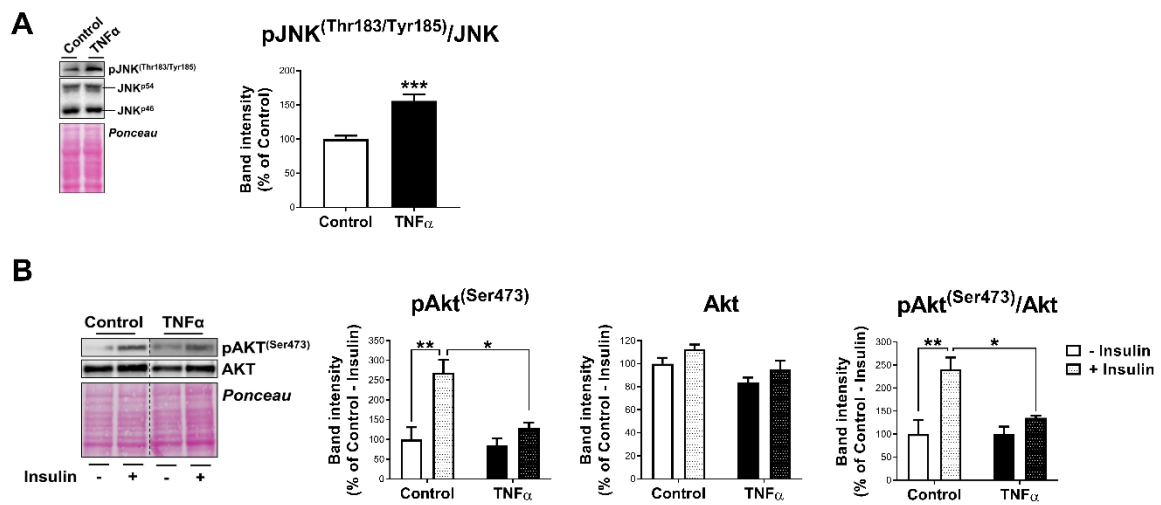

**Figure S2 (Related to Figures 5A-O). Validation of TNF $\alpha$ -induced Inflammation and Insulin Resistance in 3T3-L1 cells.** (A) Representative blot and quantification of pJNK<sup>(Thr183/Tyr185)</sup>/JNK in 3T3-L1 cells at day 6 of differentiation (D6) upon 24h of treatment with 5nM TNF $\alpha$  or vehicle (control). \*\*\*P<0.001 vs. control. (B) Representative blot and quantification of pAkt<sup>(Ser473)</sup>, Akt, and pAkt<sup>(Ser473)</sup>/Akt ratio in control or TNF $\alpha$ -treated 3T3-L1 cells (D6) stimulated or not with insulin (100nM, 5min). \*P<0.05, and \*\*P<0.01 vs. indicated. n=6. Values are given as mean  $\pm$  S.E.M.

**Figure S3 (Related to Figures 5P-R)**

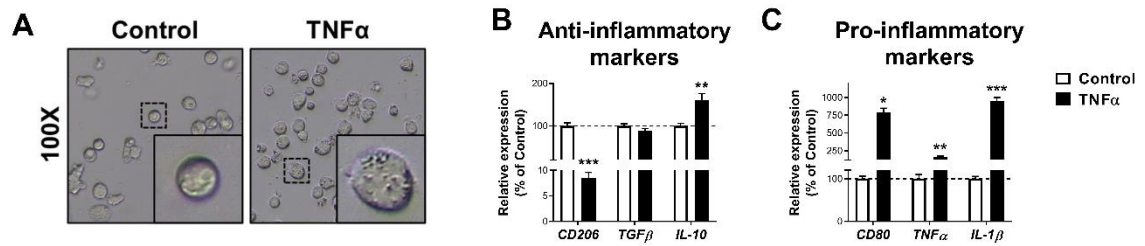

**Figure S3 (Related to Figures 5P-R). THP1 Cells Exposed to TNF $\alpha$ .** (A) Representative images from light microscopy of THP1 cells upon 24h of treatment with 5nM TNF $\alpha$  or vehicle (control). mRNA expression of anti-inflammatory markers (*CD206*, *TGF $\beta$* , and *IL-10*) (B), and pro-inflammatory markers (*CD80*, *TNF $\alpha$* , and *IL-1 $\beta$* ) (C) in THP1 cells treated with TNF $\alpha$  or vehicle (control). n=6. Values are given as mean  $\pm$  S.E.M. \*P<0.05, \*\*P<0.01 and \*\*\*P<0.001 vs. control.

**Figure S4 (Related to Figures 6-8)**

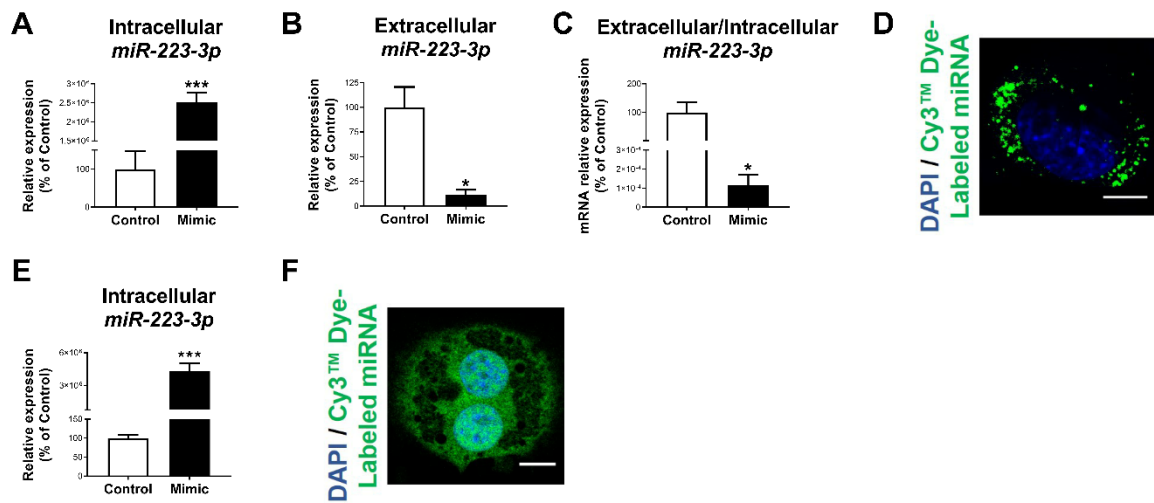

**Figure S4 (Related to Figures 6-8). Validation of *miR-223-3p* Overexpression in Adipose Cells.** Intracellular (A-F), extracellular (B) levels and extracellular/intracellular ratio (C) of *miR-223-3p*, and representative confocal micrographs (D-F) of 3T3-L1 cells transfected with negative miRNA-Control (control) or *miR-223-3p* (mimic) at day 3 (A-D) and day 6 (E-F) of differentiation. For confocal imaging cells were co-transfected with Cy3<sup>TM</sup> labelled miRNA (green) and nuclei were stained with DAPI (blue). Scale bar=10μm. N=6. Values are means ± S.E.M. \*P<0.05 and \*\*\*P<0.001 vs. control.

## SUPPLEMENTAL TABLES

**Table S1 (Related to Figure 1A). Correlations between Baseline Circulating Levels of miRNAs and ATIRI in the CORDIOPREV-DIAB Study Patients.**

|                       | ATIRI    |          |
|-----------------------|----------|----------|
|                       | <i>r</i> | <i>p</i> |
| <i>hsa-miR-150</i>    | 0.002    | 0.974    |
| <i>hsa-miR-103</i>    | -0.040   | 0.417    |
| <i>hsa-miR-28-3p</i>  | -0.035   | 0.470    |
| <i>hsa-miR-126</i>    | -0.032   | 0.511    |
| <i>hsa-miR-9</i>      | 0.013    | 0.789    |
| <i>hsa-miR-30a-5p</i> | -0.046   | 0.345    |
| <i>hsa-miR-375</i>    | 0.024    | 0.620    |
| <i>hsa-miR-29a</i>    | -0.059   | 0.229    |

Correlations were determined by Pearson's correlation coefficient test. *r*, correlation coefficient.

**Table S2 (Related to Figure 1A). Stepwise Akaike Information Criteria (AIC) Multivariable Logistic Regression.**

|                       | <b>Model 1</b> | <b>Model 2</b> | <b>Model 3</b> |
|-----------------------|----------------|----------------|----------------|
| <b>AIC</b>            | 297.15         | 295.19         | 293.94         |
| <i>hsa-miR-223-3p</i> | X              | X              | X              |
| <b>Gender</b>         | X              | X              | X              |
| <b>Glucose</b>        | X              | X              | X              |
| <b>Triglycerides</b>  | X              | X              | X              |
| <b>BMI</b>            | X              | X              | X              |
| <b>Age</b>            | X              | X              |                |
| <b>CRP</b>            | X              |                |                |

Stepwise Akaike information criterion (AIC) multivariate regression analysis including ATIRI as dependent variable and the plasma levels of the nine studied miRNAs (*miR-15*, *miR-123*, *miR-28-3p*, *miR-126*, *miR-9*, *miR-30a-5p*, *miR-223-3p*, *miR-375*, and *miR-29a*), and anthropometrical and clinical parameters as independent variables was performed in the R packet MASS using the stepAIC function. Three models were generated of which the best one with the lowest AIC value included gender, *hsa-miR-223-3p*, gender, glucose, triglycerides, and BMI. **CRP**, C-Reactive Protein; **BMI**, Body Mass Index.

**Table S3 (Related to Figure 2). Selection of Predicted *miR-223-3p* Targets Genes Resulted from the *In-silico* Analysis, and Canonical Pathways and Upstream Regulators of the *miR-223-3p* Target Genes Set according to Ingenuity Pathway Analysis (IPA). Excel file.**



**Table S4 (Related to Figure 3). Biochemical and Anthropometric Characteristics of the Study Groups according to the Incidence of T2D during the Median Follow-up of 60 Months.**

|                               | <b>Non-T2D</b> | <b>Incident-T2D</b> | <i>P Value</i> |
|-------------------------------|----------------|---------------------|----------------|
| <b>n</b>                      | 32             | 32                  | -              |
| <b>Age (years)</b>            | 60.88 ± 1.30   | 62.09 ± 1.29        | 0.508          |
| <b>WC (cm)</b>                | 104.06 ± 1.84  | 103.44 ± 1.57       | 0.799          |
| <b>BMI (Kg/m<sup>2</sup>)</b> | 29.94 ± 0.55   | 29.88 ± 0.63        | 0.941          |
| <b>TG (mg/dL)</b>             | 102.38 ± 8.87  | 117.71 ± 10.14      | 0.259          |
| <b>Chol (mg/dL)</b>           | 159.81 ± 5.72  | 156.52 ± 5.16       | 0.671          |
| <b>c-HDL (mg/dL)</b>          | 44.42 ± 1.22   | 42.48 ± 1.23        | 0.269          |
| <b>hs-CRP (mg/L)</b>          | 2.35 ± 0.53    | 2.66 ± 0.59         | 0.695          |
| <b>Glucose (mg/dL)</b>        | 91.97 ± 1.87   | 95.19 ± 2.08        | 0.253          |
| <b>HbA1c (%)</b>              | 5.78 ± 0.07    | 5.97 ± 0.08         | 0.069          |
| <b>Insulin (mU/L)</b>         | 7.07 ± 0.78    | 8.80 ± 0.85         | 0.140          |
| <b>HOMA-IR</b>                | 2.36 ± 0.21    | 2.23 ± 0.19         | 0.640          |

Values are expressed as mean ± SEM. **Non-T2D**, Subjects who did not develop T2D; **Incident-T2D**, subjects who developed T2D; **WC**, Waist circumference; **BMI**, body mass index; **TG**, triglycerides; **c-HDL**, high-density lipoprotein; **hs-CRP**, high-sensitivity C-reactive protein; **HbA1c**, glycosylated hemoglobin; **HOMA-IR**, homeostasis model assessment-insulin resistance.

**Table S5 (Related to Materials and Methods). Sequences and Transcript Sizes of Primers used in Quantitative Real-time PCR (qRT-PCR).**

| Primer sequences (5' → 3')     |                         |                         |           |
|--------------------------------|-------------------------|-------------------------|-----------|
| Gene (NCBI reference)          | Forward                 | Reverse                 | Size (bp) |
| <i>Acly</i> (NM_001199296.1)   | CACCTCCAAGAAGCCAAATC    | CCAATGAAGCCCATACTCCTT   | 87        |
| <i>Actb</i> (NM_007393.5)      | GCCTTCCTTCTTGGGTATGG    | AGCACTGTGTTGGCATAGAGG   | 108       |
| <i>Ago2</i> (NM_153178.4)      | ATGCCCTTCAAACCTCCACCT   | TGCTCCACAATTTCCCTGTT    | 169       |
| <i>Agpat3</i> (NM_053014.3)    | CCTCATCCTGACGTTCTTGG    | CGCATCAGGTTATGGGTGTT    | 69        |
| <i>Atgl</i> (NM_001163689.1)   | ATGGTCCTCCGAGAGATGTG    | AGGGTTGGGTTGGTTCAGTAG   | 68        |
| <i>Bscl2</i> (NM_001136064.3)  | CGTGATCGGGTACTGATGTATG  | CACTGAGCGTGAAGAAGTGG    | 57        |
| <i>Cd36</i> (NM_001159558.1)   | GGCAAAGAACAGCAGCAAA     | CAACAGACAGTGAAGGCTCAAA  | 73        |
| <i>Cd63</i> (NM_001042580.1)   | CAAGGAATCCACTATCCATACCC | TTCCCAAGACCTCCACAAAA    | 119       |
| <i>Cebpa</i> (NM_001287523.1)  | GTGGACAAGAACAGCAACGA    | TCACTGGTCAACTCCAGCAC    | 128       |
| <i>Cidea</i> (NM_007702.2)     | ATGGGATTGCAGACTAAGAAGG  | TAACCAGGCCAGTTGTGATG    | 47        |
| <i>Cidec</i> (NM_178373.4)     | TCCCAGAAGCCAATAAGAAGA   | CAGGTCATAGGAAAGCGAGTATG | 54        |
| <i>Dgat2</i> (NM_026384.3)     | CTACTCCAAGCCATCACCA     | CAGTTCACCTCCAGCACCTC    | 50        |
| <i>Fabp1</i> (NM_017399.5)     | ATCCGTCTGGTCAAGGTCAA    | GGGCAATCTTCTTGTGGTG     | 69        |
| <i>Fabp4</i> (NM_024406.3)     | AAGAAGTGGGAGTGGGCTTT    | CTGTCTGTCGGGTGATTT      | 84        |
| <i>Fabp5</i> (NM_010634.3)     | AGGATCTCGAAGGGAAGTGG    | CTCGGTTTTGACCGTGATGT    | 44        |
| <i>Fasn</i> (NM_007988.3)      | ATACAATGGCACCCCTGAACC   | TTACAGAGGAGAAGGCCACAA   | 159       |
| <i>Gapdh</i> (NM_001289726.1)  | GTGGCAAAGTGGAGATTGTTG   | CTCCTGGAAGATGGTGATGG    | 164       |
| <i>Glut4</i> (AB008453.1)      | AAGAGTCTAAAGCGCCTGACC   | TTGGACGCTCTCTCTCCAAC    | 94        |
| <i>Hnrnpa2b1</i> (NM_016806.3) | GCGATGGAGAGAGAAAAGGAA   | GATCCCGCATAACCACACA     | 133       |
| <i>Hprt</i> (NM_013556.2)      | TGGATACAGGCCAGACTTTGTT  | TTGCGCTCATCTTAGGCTTT    | 153       |
| <i>Hsl</i> (NM_010719.5)       | TCTAAATCCCACGAGCCCTAC   | AAGGCATATCCGCTCTCCA     | 69        |
| <i>Insr</i> (NM_010568.3)      | GTTCAAGACCAGACCCGAAG    | TCCAGACCATAGACACGGAAG   | 155       |
| <i>Lpl</i> (NM_008509.2)       | AGCCAAGAGAAGCAGCAAGA    | CCATCCTCAGTCCCAGAAAA    | 72        |
| <i>Mgl</i> (NM_001166251.1)    | TCCACAGAATGTTCCCTACCA   | GCTCATCATAACGGCCACA     | 80        |
| <i>Pck1</i> (NM_011044.3)      | CTTTGGAAGCGGATATGGTG    | TGCCTTCGGGGTTAGTTATG    | 59        |
| <i>Plin1</i> (NM_175640.2)     | TGACGACCAGACAGACACAGA   | TCACTGCGGAGATGGTGTT     | 51        |

|                               |                        |                          |     |
|-------------------------------|------------------------|--------------------------|-----|
| <i>Pparg</i> (NM_001127330.2) | GCCTCCCTGATGAATAAAGATG | AGGCTCCATAAAGTCACCAAAG   | 108 |
| <i>Scd1</i> (NM_009127.4)     | CAAAGAGAAGGGCGGAAAA    | AGCACCAGAGTGTATCGCAAG    | 89  |
| <i>Srebfl</i> (NM_011480.4)   | AGGTCACCGTTTTCTTTGTGG  | AATACAGTTCAACGCTCGCTCT   | 151 |
| <i>Ybx1</i> (NM_011732.2)     | GTCATCGCAACGAAGGTTTT   | TCAAACCTCCACAGTCTCTCCATC | 176 |

---

bp, base pairs

**Table S6 (Related to Materials and Methods). Antibodies used in Immunoblotting Analyses.**

| <b>Antibody</b>                            | <b>Commercial Source</b>  | <b>Reference</b> | <b>Host Specie</b> | <b>Dilution</b> |
|--------------------------------------------|---------------------------|------------------|--------------------|-----------------|
| <b>Anti-AKT</b>                            | Cell Signaling Technology | 9272             | Rabbit             | 1/1,000         |
| <b>Anti-pAKT<sup>(Ser473)</sup></b>        | Cell Signaling Technology | 4060             | Rabbit             | 1/750           |
| <b>Anti-ARF6</b>                           | Santa Cruz Biotechnology  | sc-7971          | Mouse              | 1/1,000         |
| <b>Anti-AS160</b>                          | Merck Millipore           | 07-741           | Rabbit             | 1/1,000         |
| <b>Anti-pAS160<sup>(Ser666)</sup></b>      | Merck Millipore           | 09-489           | Rabbit             | 1/750           |
| <b>Anti-CD63</b>                           | Sigma-Aldrich             | SAB4301607       | Rabbit             | 1/1,000         |
| <b>Anti-CHOP</b>                           | Cell Signaling Technology | 2895             | Mouse              | 1/1,000         |
| <b>Anti-GLUT4</b>                          | Abcam                     | ab35826          | Mouse              | 1/1,000         |
| <b>Anti-GRP78/BiP</b>                      | Santa Cruz Biotechnology  | sc-376768        | Mouse              | 1/1,000         |
| <b>Anti-GSS</b>                            | Abcam                     | Ab133592         | Rabbit             | 1/1,000         |
| <b>Anti-IRS1</b>                           | Santa Cruz Biotechnology  | sc-7200          | Rabbit             | 1/1,000         |
| <b>Anti-pIRS1<sup>(Ser307)</sup></b>       | Santa Cruz Biotechnology  | sc-33956         | Rabbit             | 1/750           |
| <b>Anti-pIRS1<sup>(Tyr612)</sup></b>       | Merck Millipore           | 09-432           | Rabbit             | 1/750           |
| <b>Anti-JNK</b>                            | R&D Systems               | AF387            | Rabbit             | 1/1,000         |
| <b>Anti-pJNK<sup>(Thr185/Tyr185)</sup></b> | R&D Systems               | AF1205           | Rabbit             | 1/1,000         |
| <b>Anti-PGC1<math>\alpha</math></b>        | Abcam                     | ab54481          | Rabbit             | 1/1,000         |
| <b>Anti-SOD1</b>                           | Sigma-Aldrich             | HPA001401        | Rabbit             | 1/1,000         |
| <b>Anti-UCP1</b>                           | Abcam                     | ab23841          | Rabbit             | 1/750           |
| <b>Anti-Mouse IgG peroxidase</b>           | Sigma-Aldrich             | A-9044           | Rabbit             | 1/2,500         |
| <b>Anti-Rabbit IgG peroxidase</b>          | Sigma-Aldrich             | A-8275           | Goat               | 1/2,500         |
